# Supplementary material
Source: publisher figshare collection journal article supplement (https://acs.figshare.com/ndownloader/files/10325418)
Supplement: Supplementary file 1 [file 10325418]

## Sheet: lipid exchange
		stock solutions
		c(POPC) [mM]	c(POPG) [mM]		c(MβCD) [mM]			accessibility factor POPC
		40	7.5		150			0.5
														output: pipetting scheme
		1) select target		2) select POPC conc.		3) select MbCD load		4) select sample volume		output:	output:	output:		first step			second step
		X out,asy(POPG)		c(POPC) [mM]		MbCD_sat [%]		V [µl]		c(POPG) [mM]	X(POPG)	c(MbCD) [mM]		V(MbCD) [µl]	V(POPG) [µl]	V(buffer) [µl]	V(POPC) [µl]
		0.05		5		0.5		1000		0.131579	0.025641	31.8638		212.425	17.5439	645.031	125
		0.1		5		0.5		1000		0.277778	0.0526316	39.3617		262.412	37.037	575.551	125
		0.15		5		0.5		1000		0.441176	0.0810811	45.2226		301.484	58.8235	514.693	125
		0.2		5		0.5		1000		0.625	0.111111	50.4864		336.576	83.3333	455.091	125
		0.25		5		0.5		1000		0.833333	0.142857	55.545		370.3	111.111	393.589	125
		0.3		5		0.5		1000		1.07143	0.176471	60.6193		404.128	142.857	328.014	125
		0.35		5		0.5		1000		1.34615	0.212121	65.8735		439.157	179.487	256.356	125
		0.3915		5.3		0.82		1000		1.70497	0.243394	59.974		399.827	227.329	240.344	132.5
		0.45		5		0.5		1000		2.04545	0.290323	77.5436		516.957	272.727	85.3154	125
														evtl. andersrum? Mit diagram? Wenn, aber schöner mit origin und echtem fit?
		input field
		output field
							0.75
														0.000241548	0.241548
														0.0028556	2.8556
														0.00339597	3.39597
														0.00403863	4.03863
														0.00480303	4.80303
														0.0057123	5.7123
														0.00679412	6.79412
														0.00808164	8.08164
														0.0096148	9.6148
							0							0.0114421	11.4421
							0							0.0136232	13.6232
							0							0.0162333	16.2333
						0	0							0.0205117	20.5117
						0	0							0.0245548	24.5548
						0	0							0.0295251	29.5251
						0	0							0.0329895	32.9895
						0	0							0.03576	35.76
						0	0							0.0381199	38.1199
						0	0							0.0402043	40.2043
						0	0							0.0420896	42.0896
						0	0							0.0438234	43.8234
						0	0							0.0454373	45.4373
						0	0							0.046954	46.954
						0	0							0.0483898	48.3898
						0	0							0.0497571	49.7571
						0	0							0.0510658	51.0658
						0	0							0.0523235	52.3235
						0	0							0.0535364	53.5364
						0	0							0.0547096	54.7096
		0.0017		1.7		0	1.275							0.0558474	55.8474
		0.0018		1.8		0	1.35							0.0569533	56.9533
		0.0019		1.9		0	1.425							0.0580303	58.0303
		0.002		2		0	1.5							0.0590812	59.0812
		0.0021		2.1		0	1.575							0.0601081	60.1081
		0.0022		2.2		0	1.65							0.0611129	61.1129
		0.0023		2.3		0	1.725							0.0620975	62.0975
		0.0024		2.4		0	1.8							0.0630634	63.0634
		0.0025		2.5		0	1.875							0.0640118	64.0118
		0.0026		2.6		0	1.95							0.064944	64.944
		0.0027		2.7		0	2.025							0.065861	65.861
		0.0028		2.8		0	2.1							0.0667639	66.7639
		0.0029		2.9		0	2.175							0.0676535	67.6535
		0.003		3		0	2.25							0.0685306	68.5306
		0.0031		3.1		0	2.325							0.0693959	69.3959
		0.0032		3.2		0	2.4							0.0702501	70.2501
		0.0033		3.3		0	2.475							0.0710938	71.0938
		0.0034		3.4		0	2.55							0.0719275	71.9275
		0.0035		3.5		0	2.625							0.0727517	72.7517
		0.0036		3.6		0	2.7							0.0735669	73.5669
		0.0037		3.7		0	2.775							0.0743736	74.3736
		0.0038		3.8		0	2.85							0.0751721	75.1721
		0.0039		3.9		0	2.925							0.0759628	75.9628
		0.004		4		0	3							0.0767461	76.7461
